# Supplementary material
Source: MDPI journal article supplement (https://www.mdpi.com/2073-4441/12/12/3315)
Supplement: s1 [file s1]

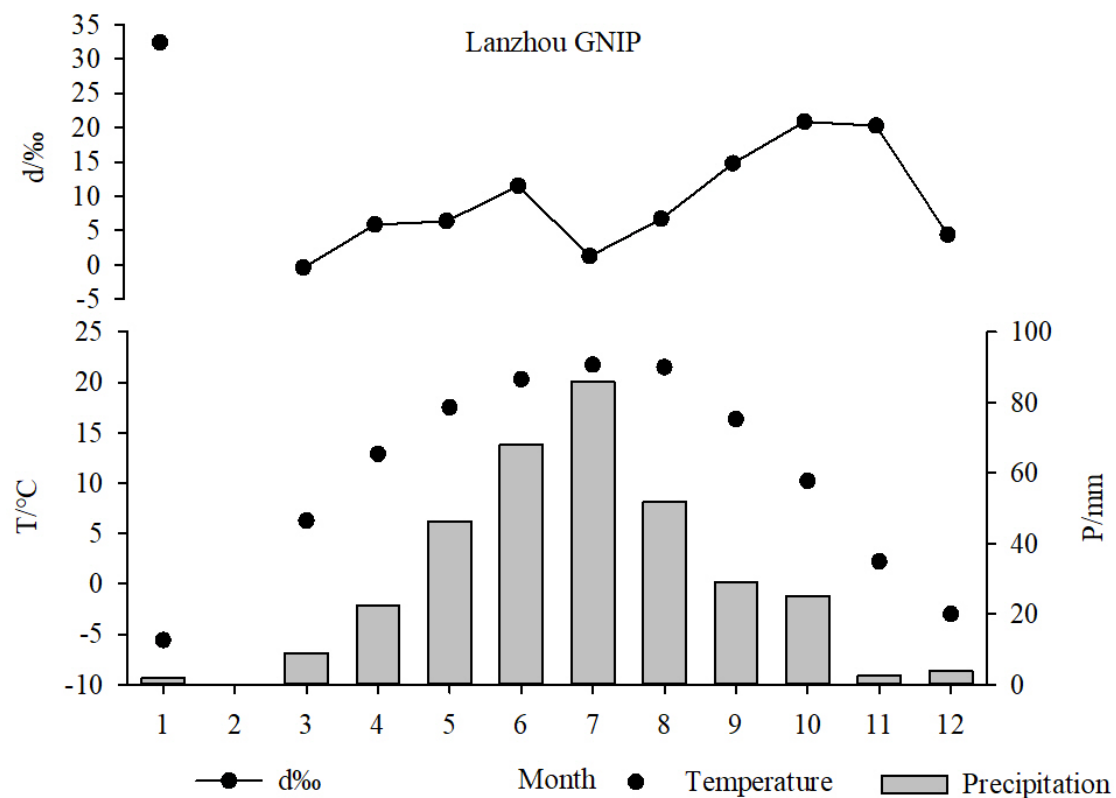

**Figure S1.** Variation of monthly  $d$  value at the GNIP Lanzhou station.

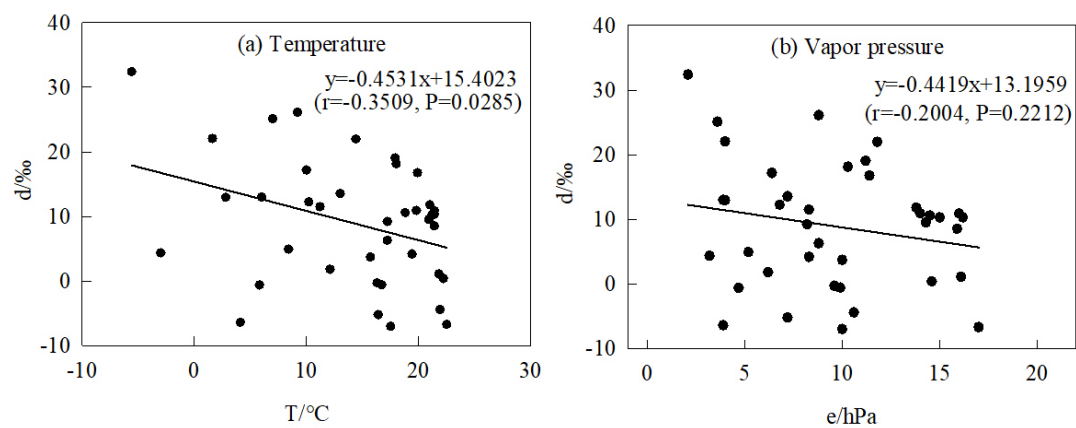

**Figure S2.** Correlations between  $d$  value and air temperature (a) or water vapor pressure (b) at the GNIP Lanzhou station.

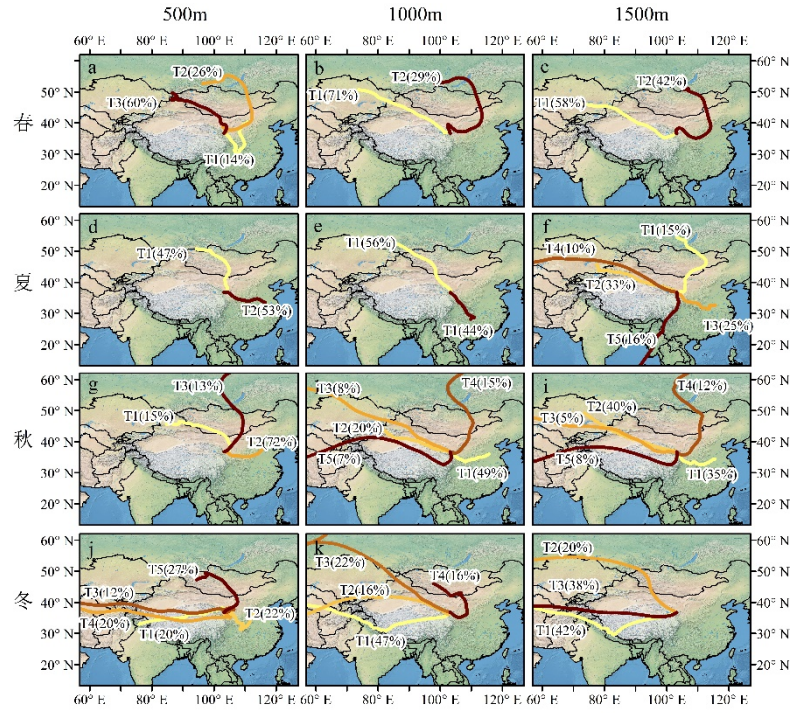

**Figure S3.** Clustered backward trajectories during different seasons to the Lanzhou city in 2011.

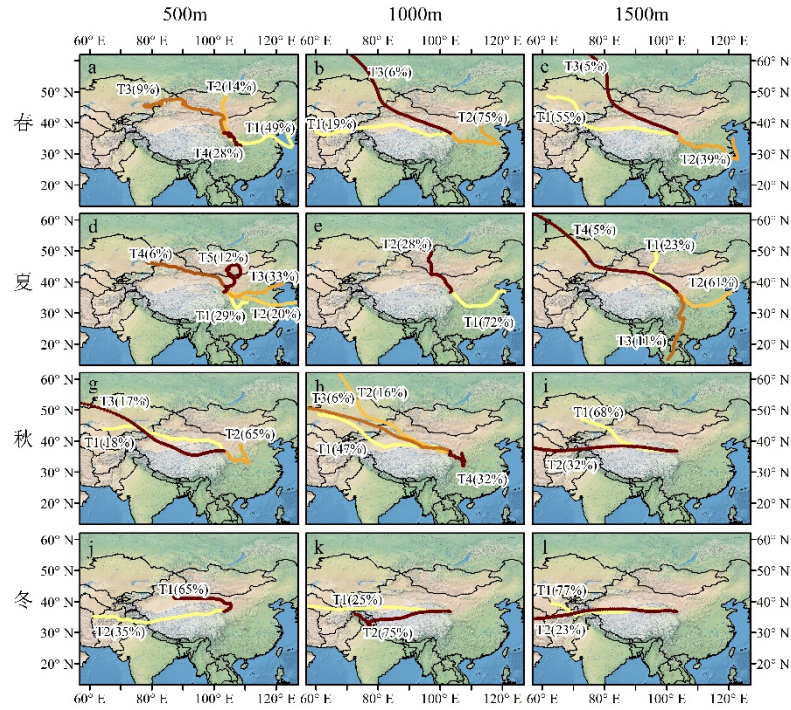

**Figure S4.** Clustered backward trajectories during different seasons to the Lanzhou city in 2012.



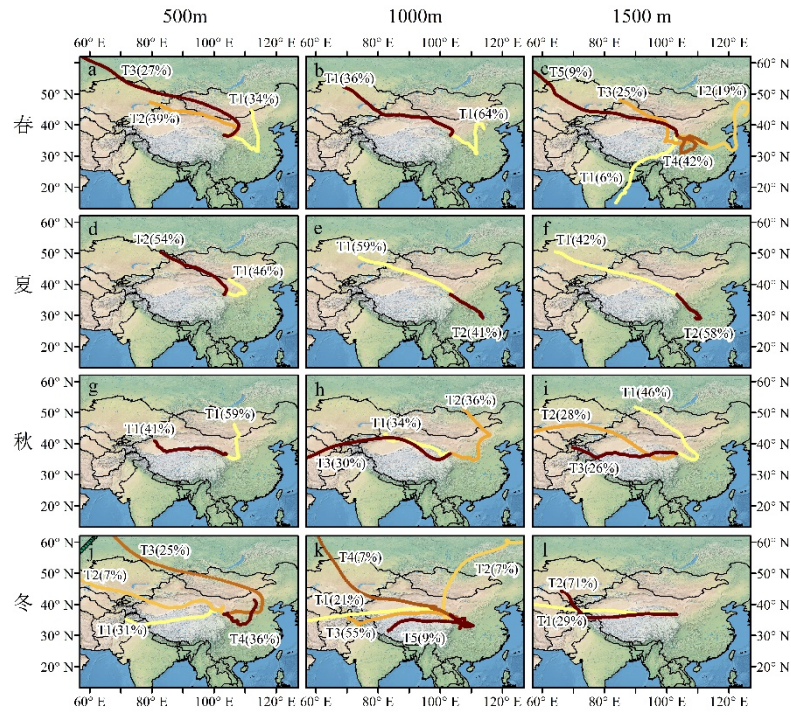

**Figure S5.** Clustered backward trajectories during different seasons to the Lanzhou city in 2013.

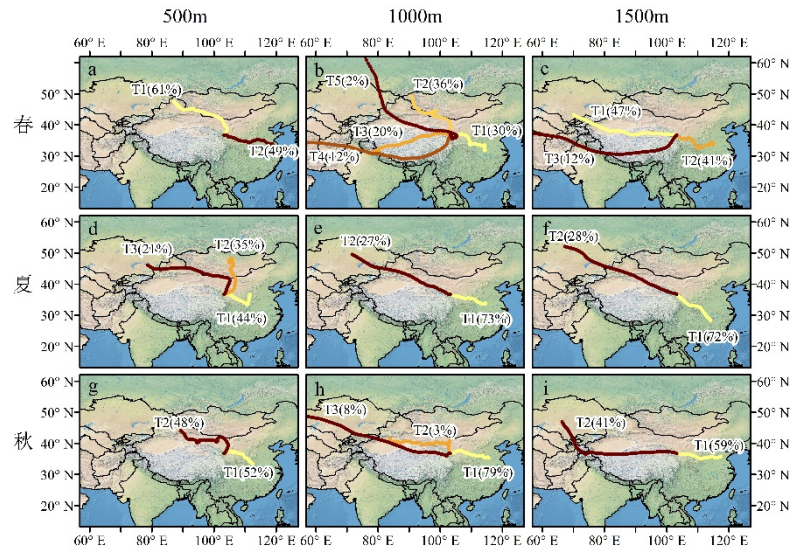

**Figure S6.** Clustered backward trajectories during different seasons to the Lanzhou city in 2014.
